# Supplementary material
Source: PubMed Central journal article supplement (PMC6082127)
Supplement: NIHMS983384-supplement-Supp_Fig.pdf [file NIHMS983384-supplement-Supp_Fig.pdf]

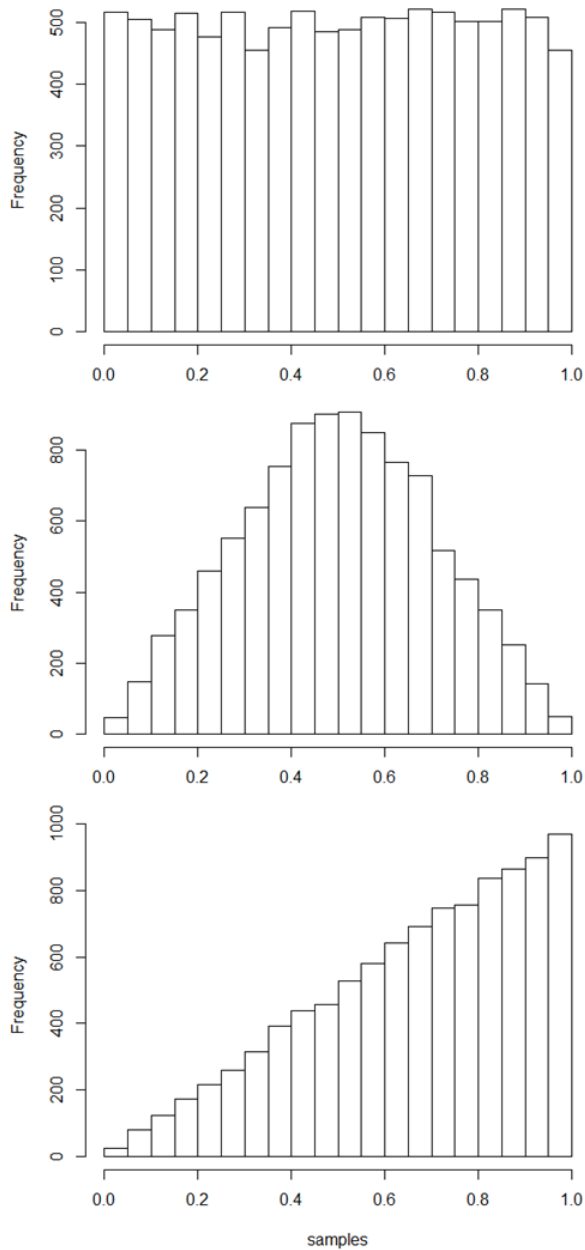

Figure S1. Histograms illustrating the tested shapes for the distribution (X) of an ingredient's weight fraction between its upper and lower bounds: uniform (top), symmetric triangle (middle), and high-weighted triangle (bottom).

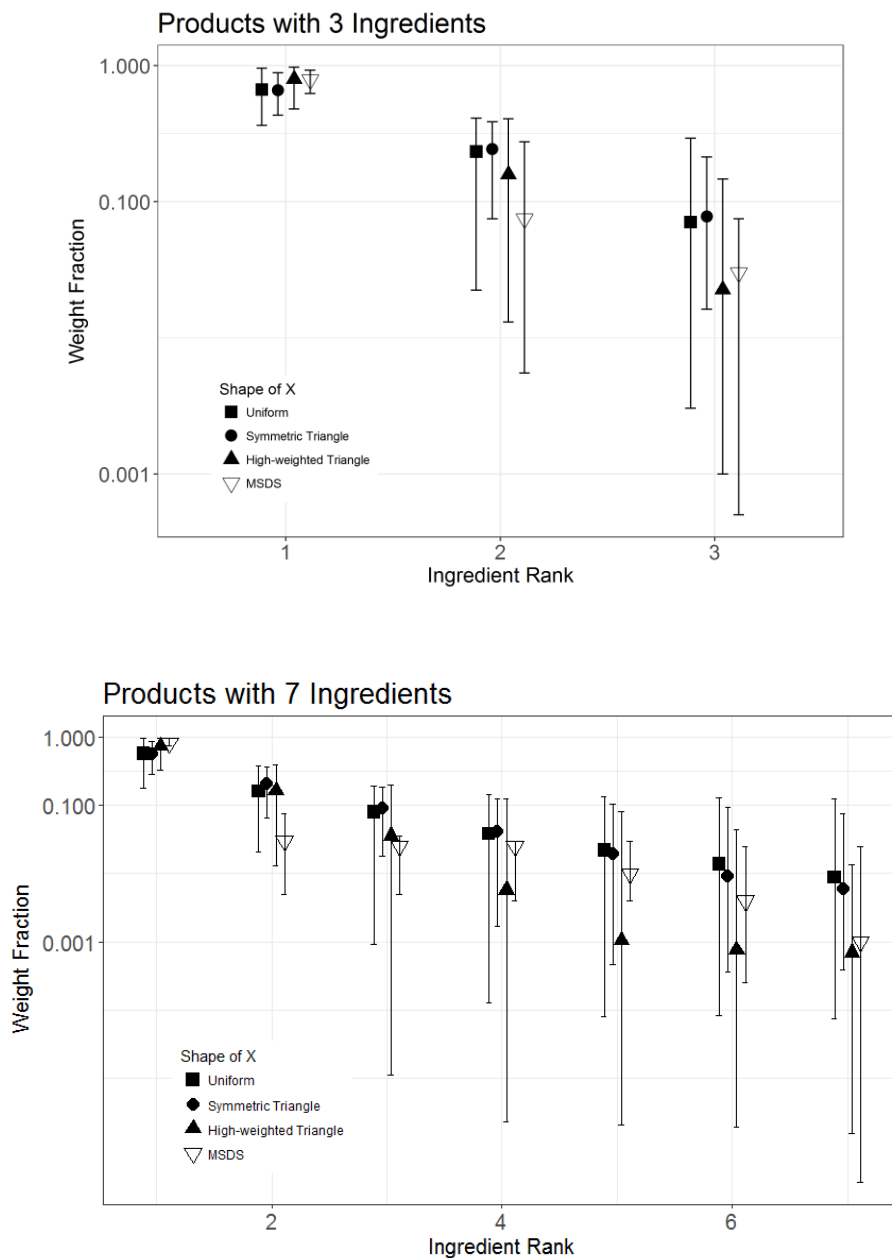

Figure S2. Comparison of predicted weight fractions from ingredient lists with WF values reported on Material Safety Data Sheets (MSDS) for products having 3 (N=89) and 7 (N=4) reported ingredients. Plotted points are means; bars extend to the 5<sup>th</sup> (LCL) and 95<sup>th</sup> (UCL) percentiles.

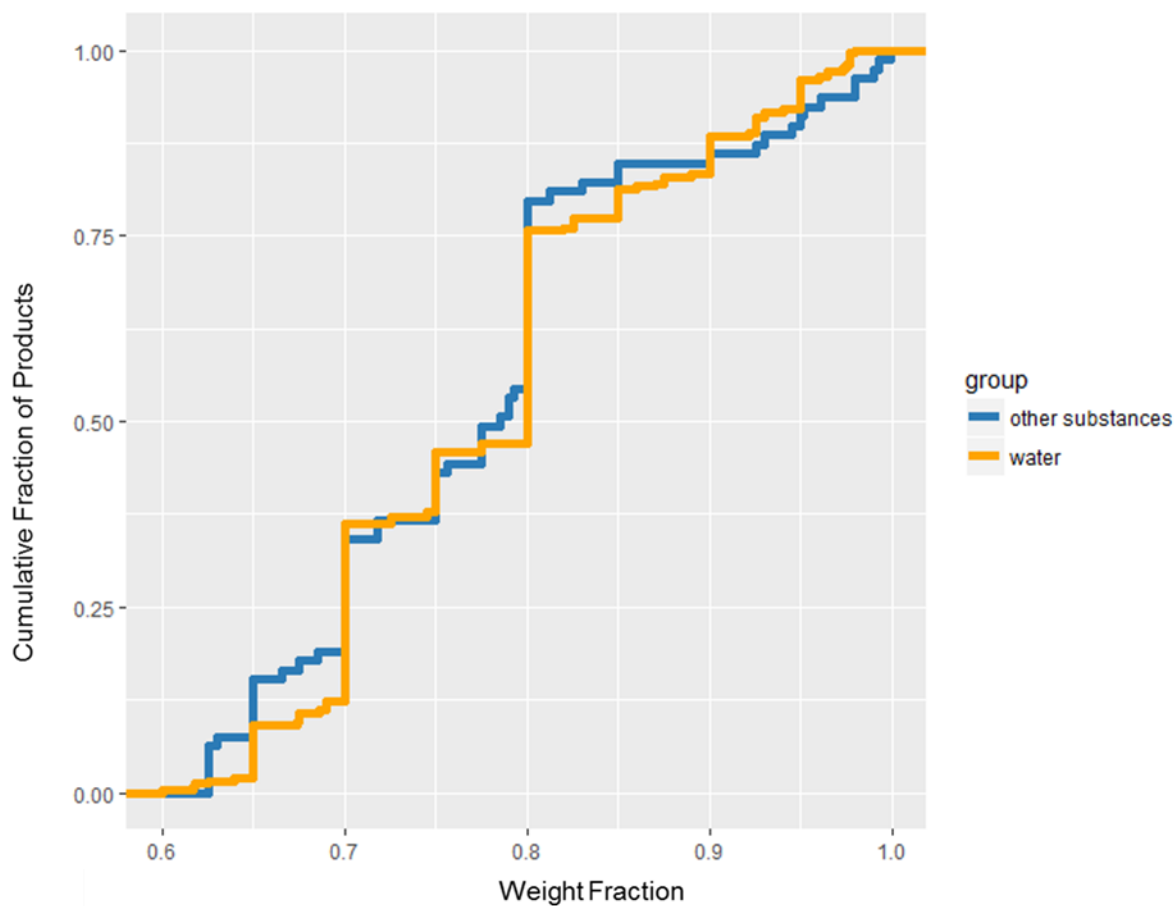

Figure S3. Cumulative distributions of the WF of the first ingredient for products in the MSDS dataset.

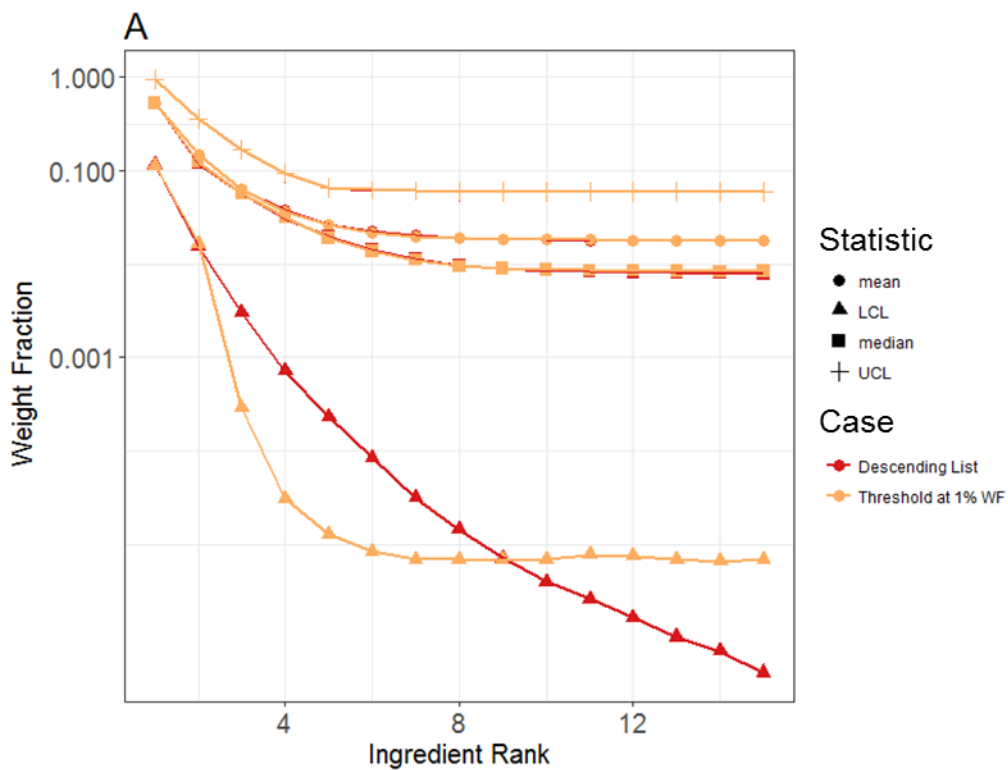

Figure S4. Predictions of range of weight fractions (F) for a list with 15 ingredients using a uniform distribution for X and labeling Case 1 (all ingredients reported in descending order) and Case 2 (ingredients with WF < 0.01 reported in any order).
